# Supplementary material for: SSRE: Cell Type Detection Based on Sparse Subspace Representation and Similarity Enhancement
Source: PubMed Central journal article supplement (PMC8602764; doi:10.1016/j.gpb.2020.09.004), 2021-02-27

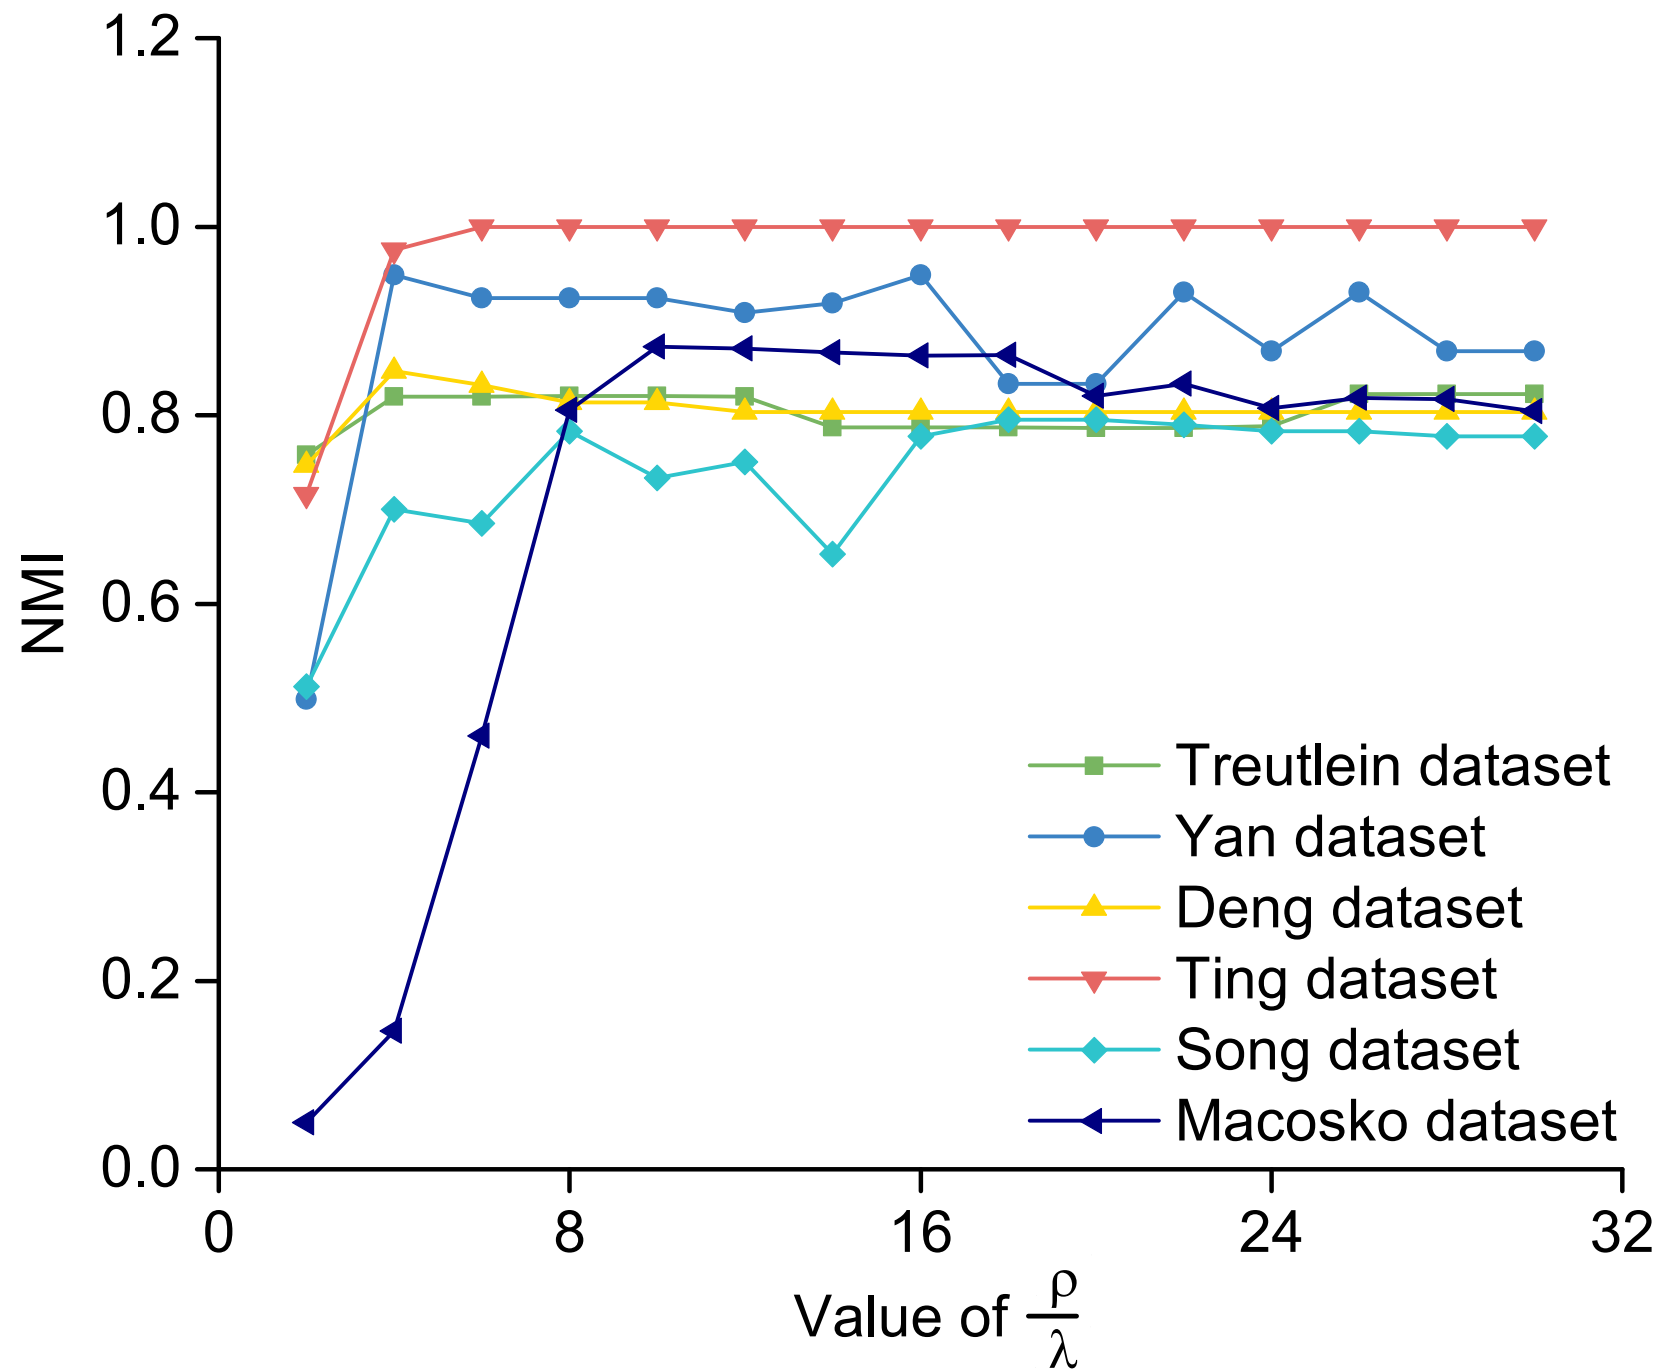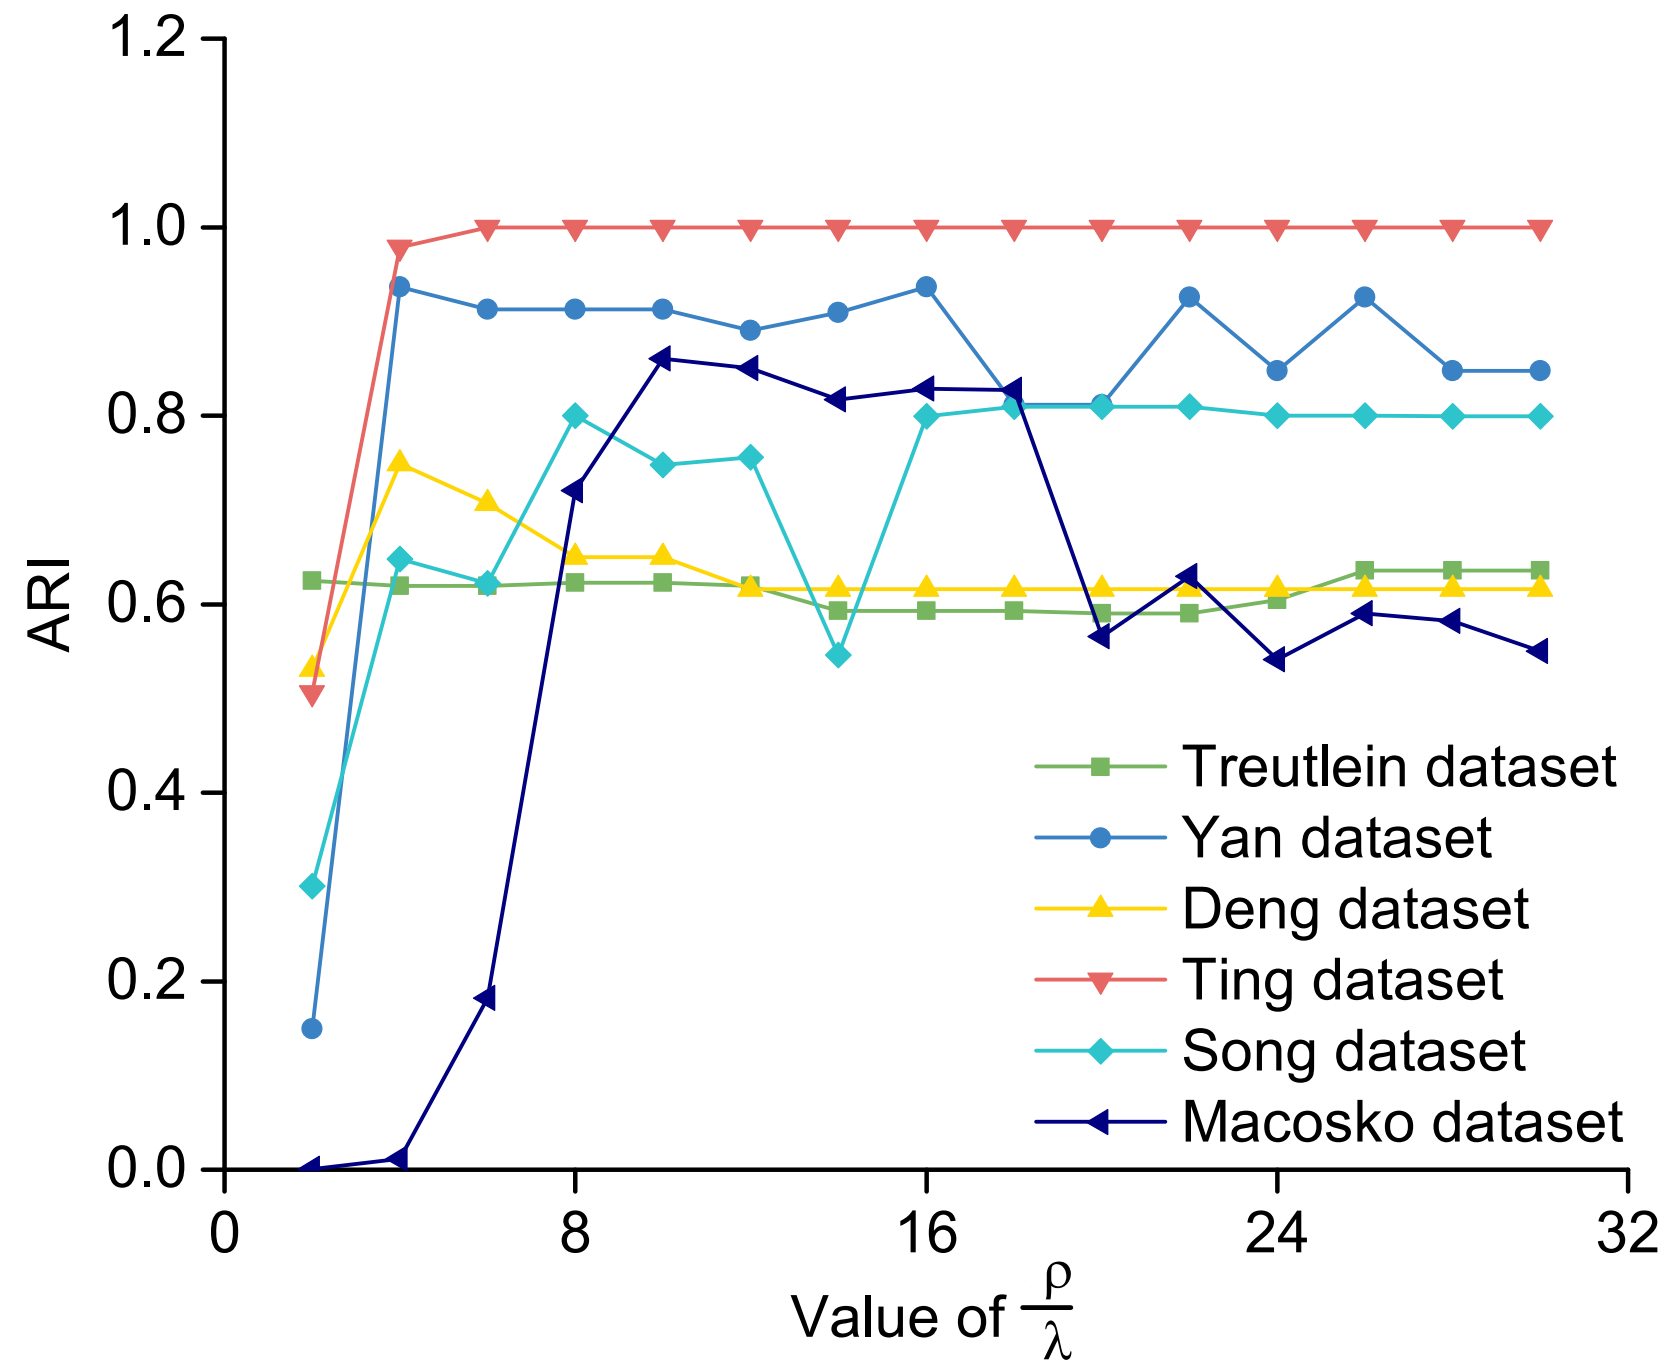

Supplement: mmc2.pdf [file mmc2.pdf]
