# Supplementary material for: SSRE: Cell Type Detection Based on Sparse Subspace Representation and Similarity Enhancement
Source: PubMed Central journal article supplement (PMC8602764; doi:10.1016/j.gpb.2020.09.004), 2021-02-27

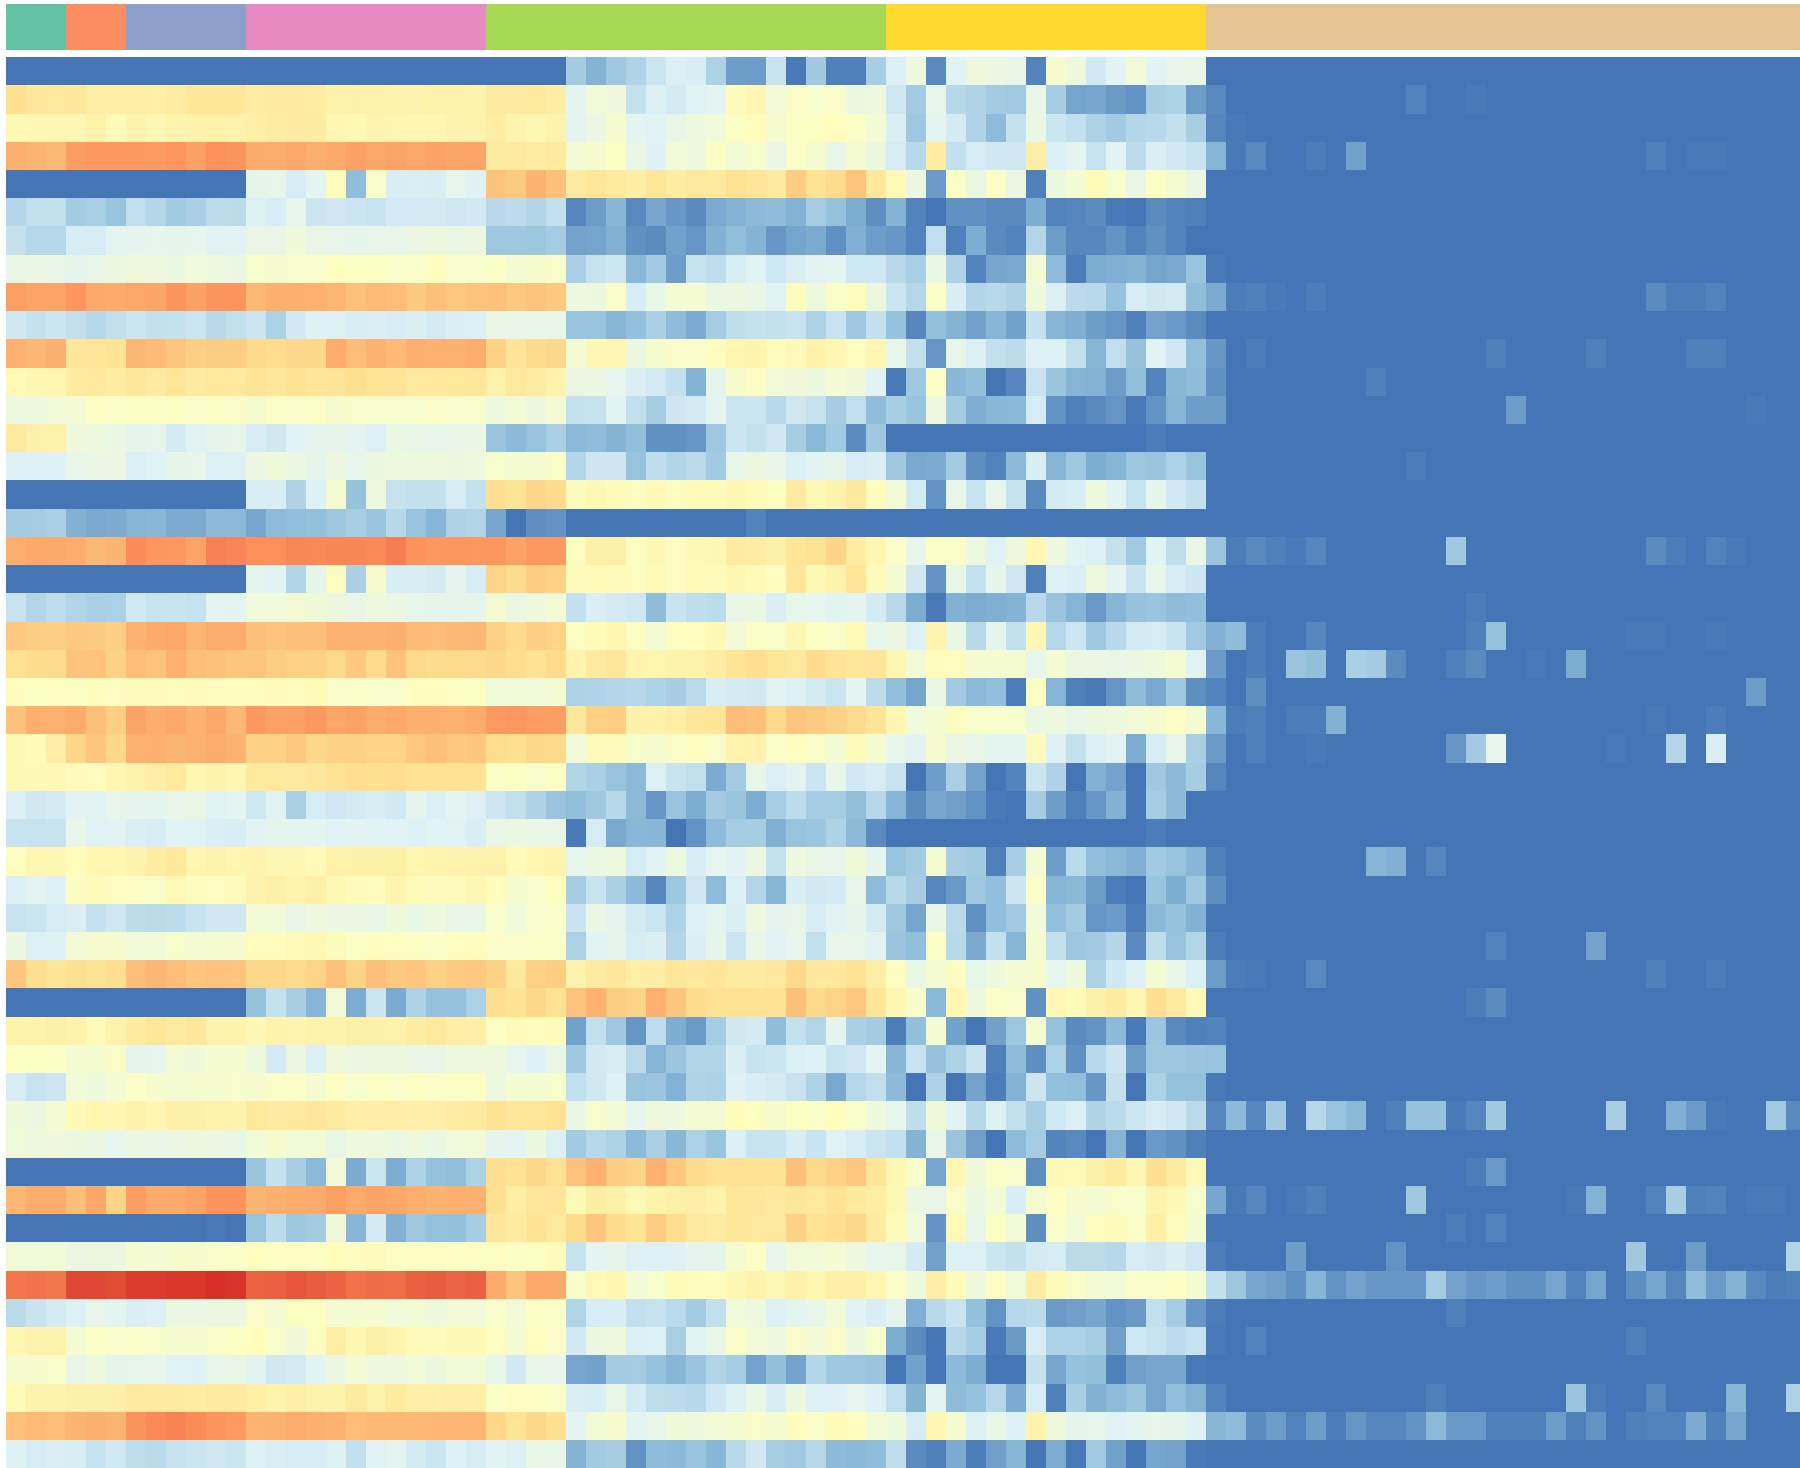

Top 50 DGEs

- BTN1A1*
- PDE8B*
- CCDC147*
- WEE2*
- MBD3L2*
- ZFPM2*
- FLJ40852*
- HDAC9*
- KPNA7*
- ABCC6*
- PCP4L1*
- NLRP11*
- UNC13C*
- CLEC10A*
- TOX2*
- MBD3L5*
- ADRA2B*
- H1FOO*
- MBD3L3*
- PKD1L3*
- NLRP4*
- GDF9*
- DCDC2*
- PLAC1L*
- OTX2*
- ACCSL*
- HAP1*
- PRR5L*
- NLRP13*
- PATL2*
- STK32B*
- PADI6*
- ACTL8*
- PRAMEF9*
- TRIM77*
- CNRIP1*
- HDC*
- CNNM2*
- CCDC27*
- PRAMEF15*
- TCL1A*
- PRAMEF4*
- MSRA*
- TUBB8*
- CSF1R*
- C6orf52*
- ALOX15*
- FAM46C*
- TUBB4Q*
- HHAT*

Cell type

- Oocyte
- Zygote
- 2-cell
- 4-cell
- 8-cell
- Morulae
- Late blastocyst

Gene expression

Log<sub>2</sub>(RPKM+1)

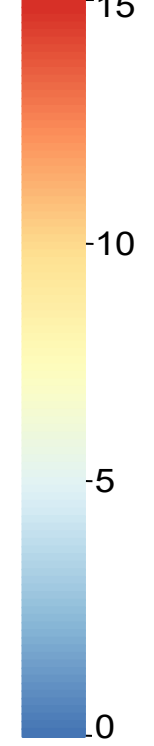

Supplement: mmc3.pdf [file mmc3.pdf]
